# Supplementary material for: Addressing the Structural Organization of Silicone Alternatives in Formulations by Molecular Dynamics Simulations and a Novel Equilibration Protocol
Source: MDPI journal article supplement (doi:10.3390/polym15040796), 2023-02-04
Supplement: s1 [file s1]

# Addressing the Structural Organization of Silicone Alternatives in Formulations by Molecular Dynamics Simulations and a Novel Equilibration Protocol

Tiago Ferreira <sup>1,2,3</sup>, Ana Loureiro <sup>1,2,3</sup>, Jennifer Noro <sup>1,2,3</sup>, Artur Cavaco-Paulo <sup>1,2,3,\*</sup> and Tarsila G. Castro <sup>1,2,\*</sup>

<sup>1</sup> CEB—Centre of Biological Engineering, University of Minho, Campus de Gualtar, 4710-057 Braga, Portugal

<sup>2</sup> LABBELS—Associate Laboratory, Campus de Gualtar, 4710-053 Braga, Portugal

<sup>3</sup> SOLFARCOS—Pharmaceutical and Cosmetic Solutions, 4710-053 Braga, Portugal

\* Correspondence: artur@deb.uminho.pt (A.C.-P.); castro.tarsila@ceb.uminho.pt (T.G.C.)

## Supporting Information

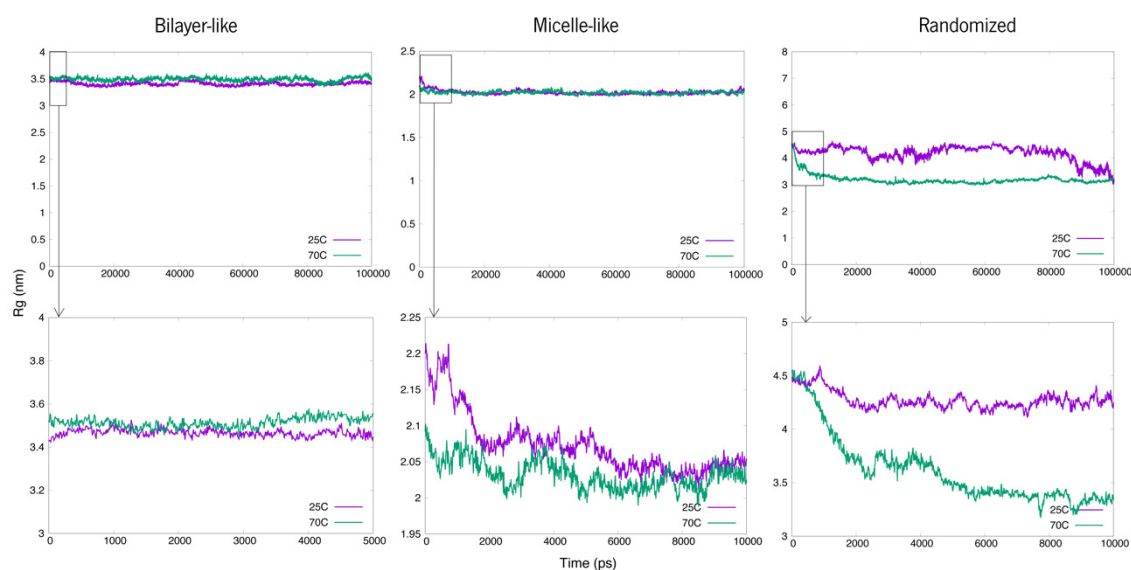

**Figure S1.** Radius of Gyration regarding the system A, both in 25°C (purple) and 70°C (green), supporting the data in Figure 4. In the second row an amplified version is presented to better understand how little time it takes for the system to appear to stabilize.

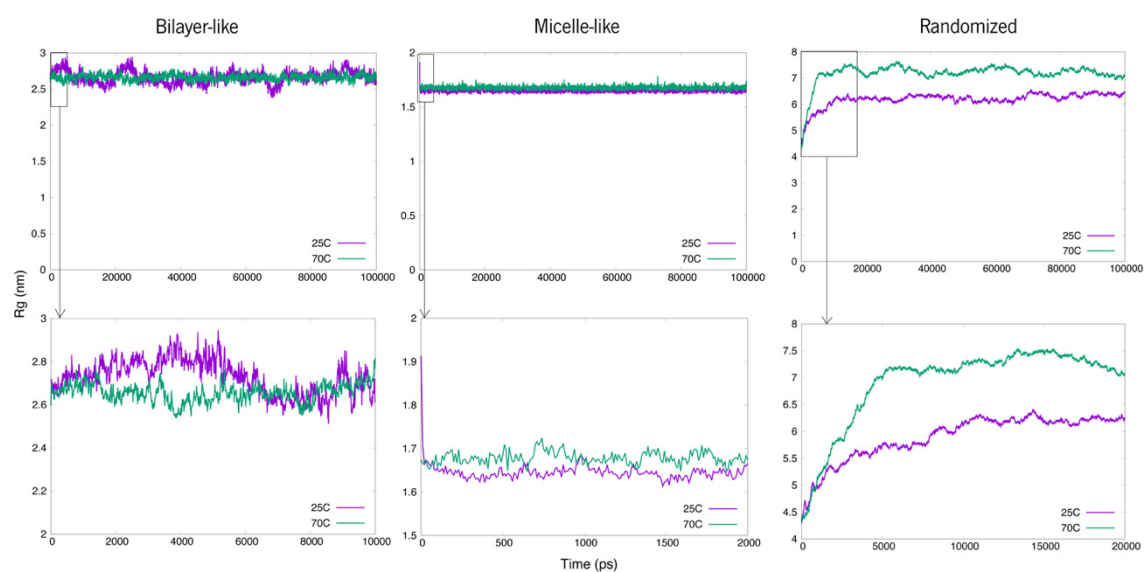

**Figure S2.** Radius of Gyration regarding the system B, both in 25°C (purple) and 70°C (green), supporting the data in Figure 5. In the second row an amplified version is presented to better understand how little time it takes for the system to appear to stabilize

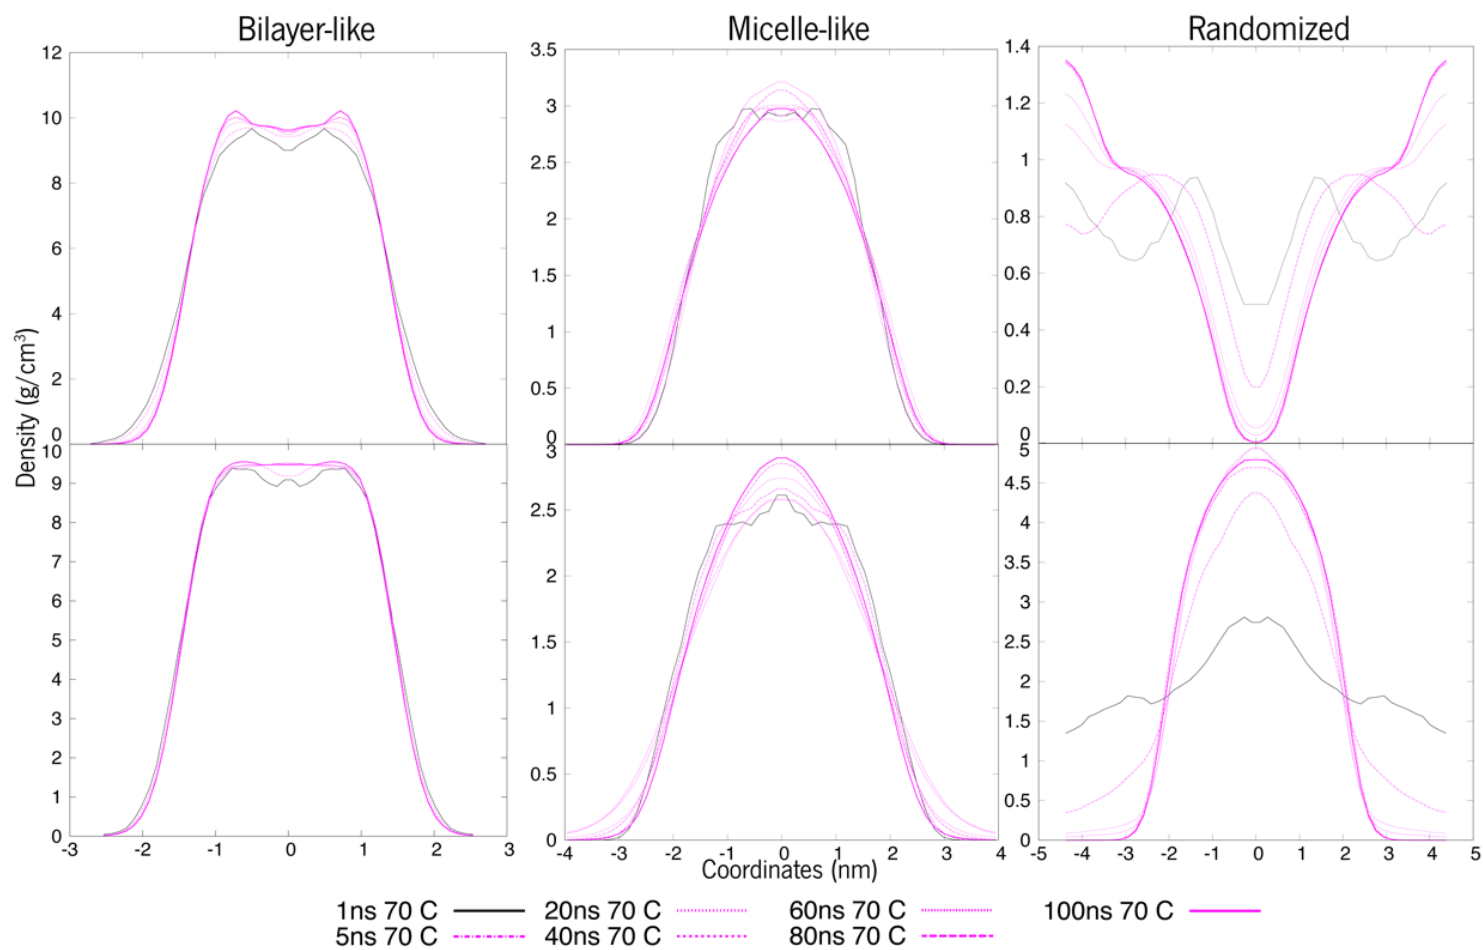

**Figure S3.** Particle densities at a 5, and then 20 ns interval regarding system A. The data shown here supports Figure 4 in our work, further enhancing the irregularities in the density profile of the components throughout time in both 25° C (top row) and 70° C (bottom row).

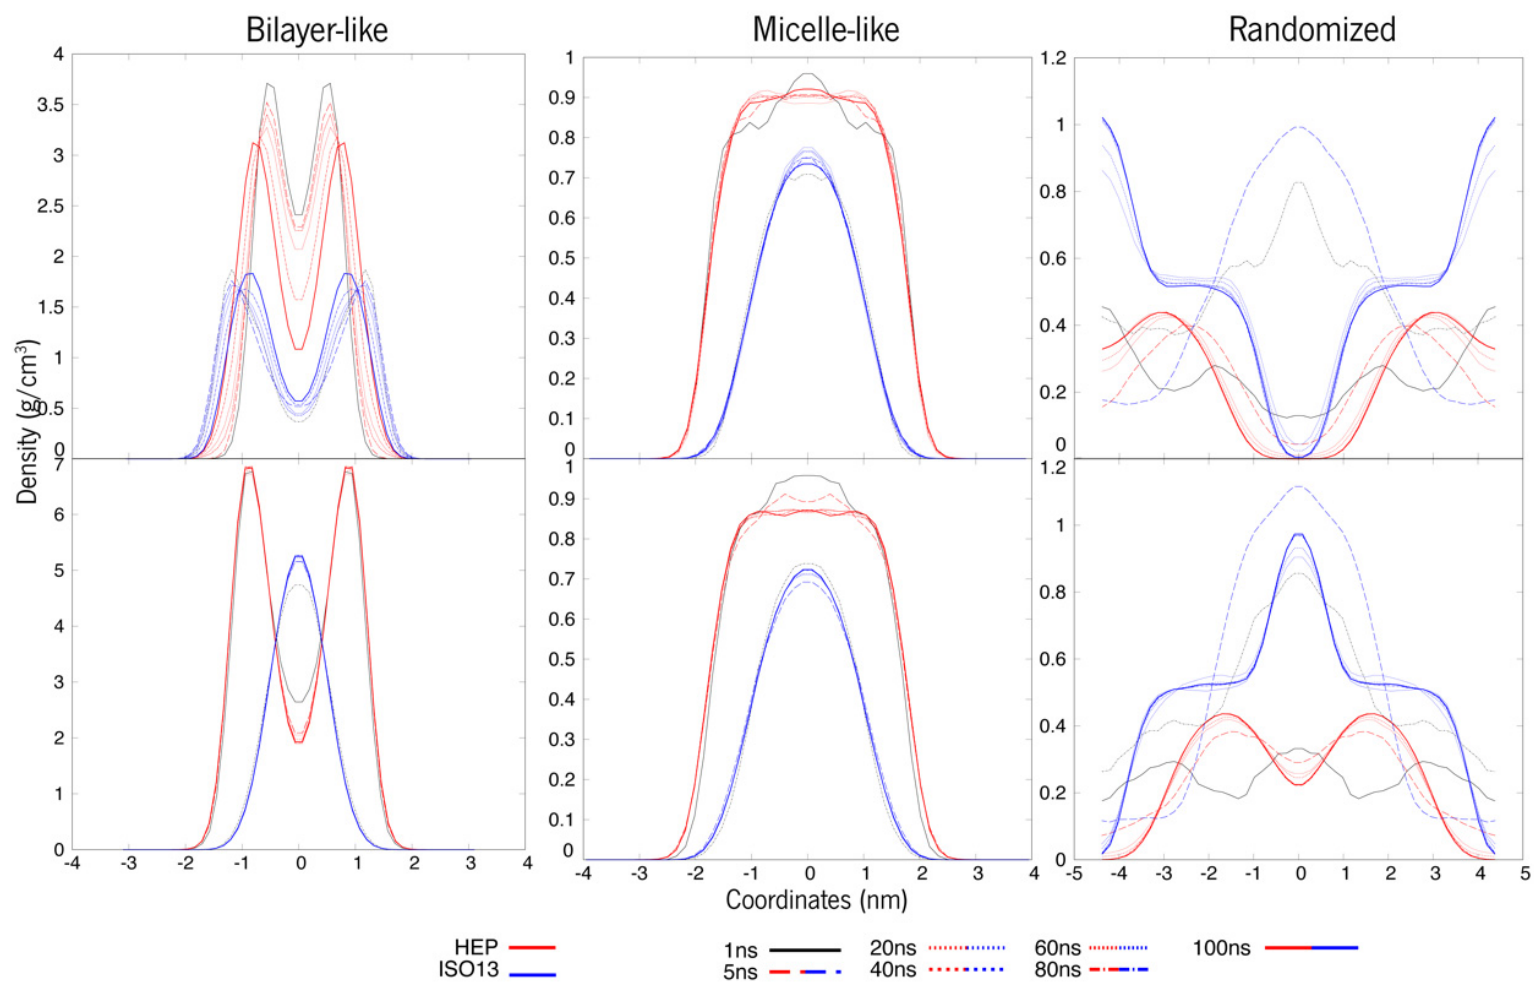

**Figure S4.** Particle densities at a 5, and then 20 ns interval regarding system B. The data shown here supports Figure 5 in our work, further enhancing the irregularities in the density profile of the components throughout time in both 25° C (top row) and 70° C (bottom row).

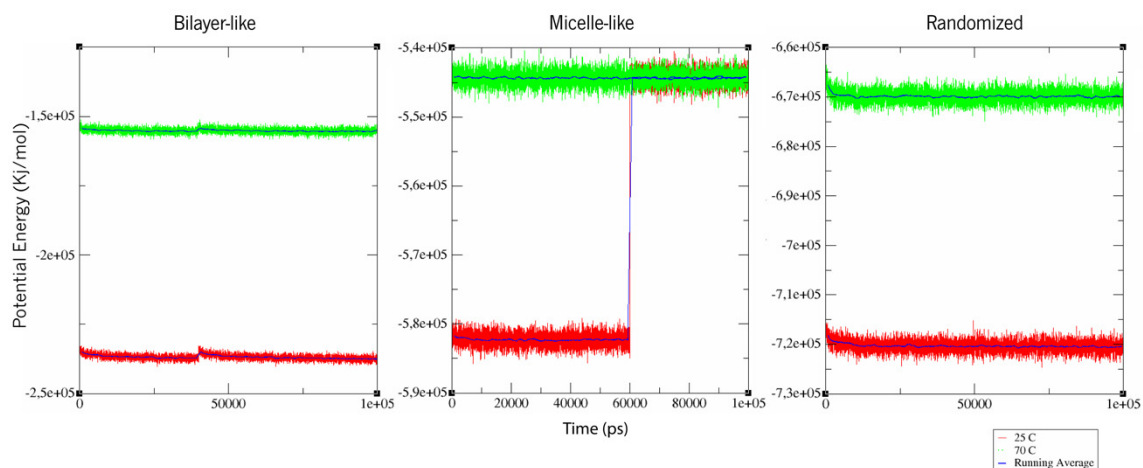

**Figure S5.** Potential energies of system A at both 25 °C, in red, and 70 °C in green with respective running averages. The figure herein serves as support to Figure 4 in the manuscript, yet another representation of how such measurements can represent the apparent stability of these systems under study when it is not the case.

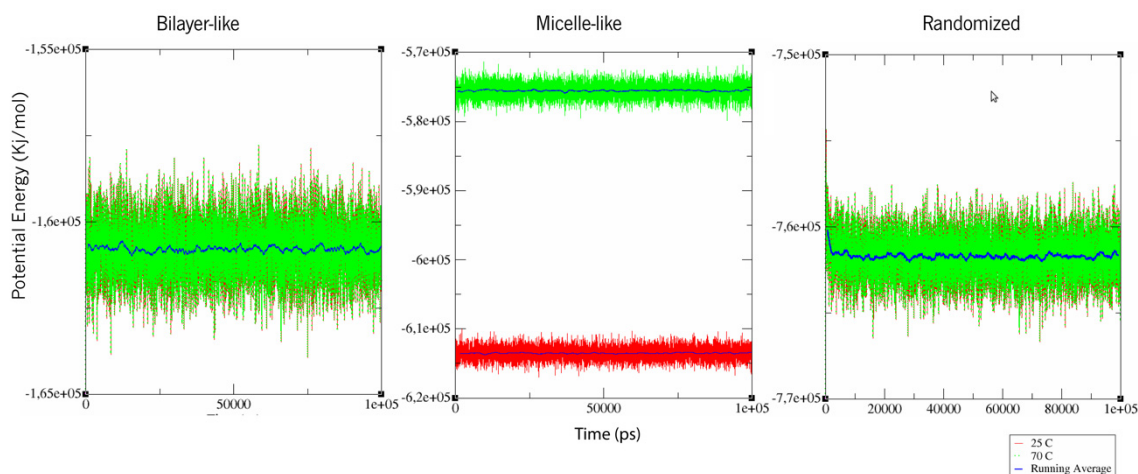

**Figure S6.** Potential energies of system B at both 25 °C, in red, and 70 °C in green with respective running averages. The figure herein serves as support to Figure 5 in the manuscript, and like the latter image, another case where apparent, yet possibly misleading stability is shown.
